# Supplementary material
Source: publisher site journal article supplement (https://www.dovepress.com/article/323286)
Supplement: Supplementary file 1 [file get_supplementary_file.php]

## Multimedia Appendix 1:

**Example: Confusion matrix of AHI ≥5**

| Confusion matrix | | Algorithm detection | |
| --- | --- | --- | --- |
| AHI ≥5 | AHI <5 |
| Gold standard  reference value | AHI ≥5 | TP (True Positive) | FN (False Negative) |
| AHI <5 | FP (False Positive) | TN (True Negative) |

## Multimedia Appendix 2:

## Multimedia Appendix 3:
